# Supplementary material for: Transcriptome Analysis of Bombyx mori Larval Midgut during Persistent and Pathogenic Cytoplasmic Polyhedrosis Virus Infection
Source: PubMed Central journal article supplement (PMC4376736; doi:10.1371/journal.pone.0121447), 2015-03-27

Sequence distribution: biological process

SeqNr

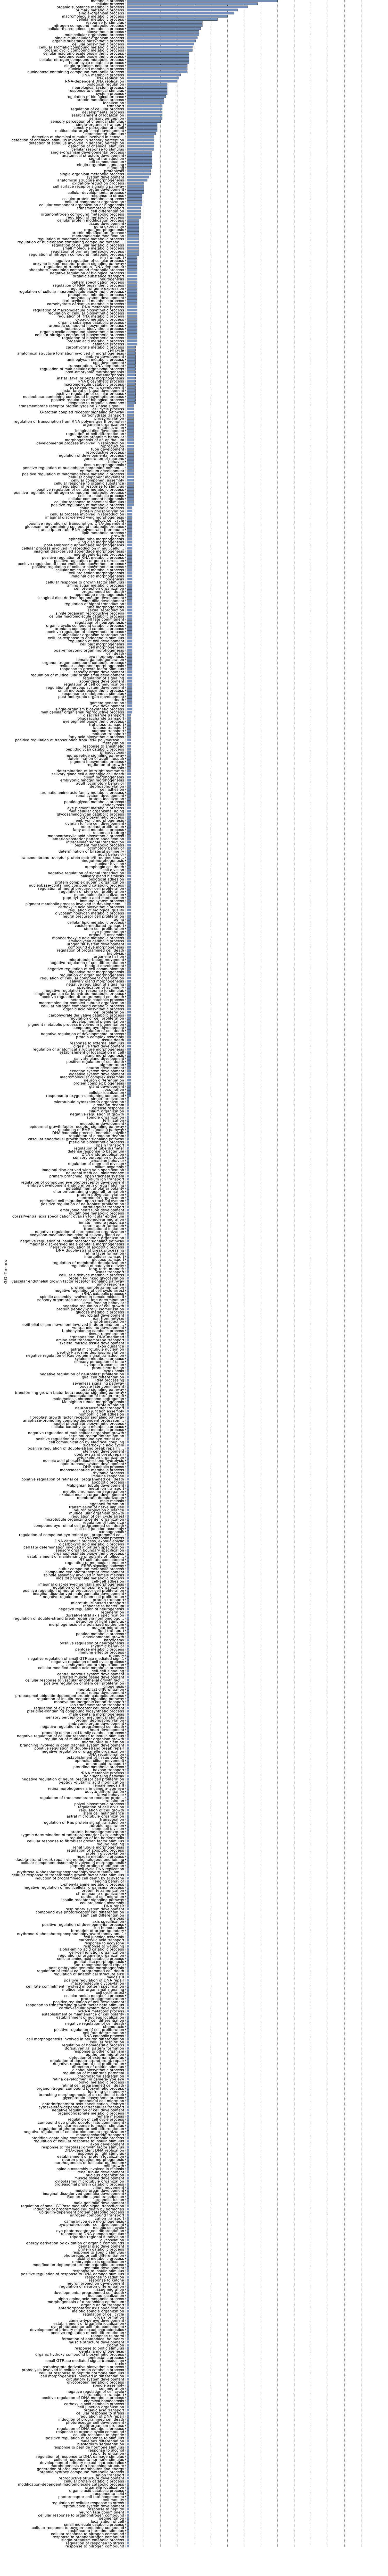

GO-Terms

GO-Terms

GO-Terms

GO-Terms

Sequence distribution: molecular\_function

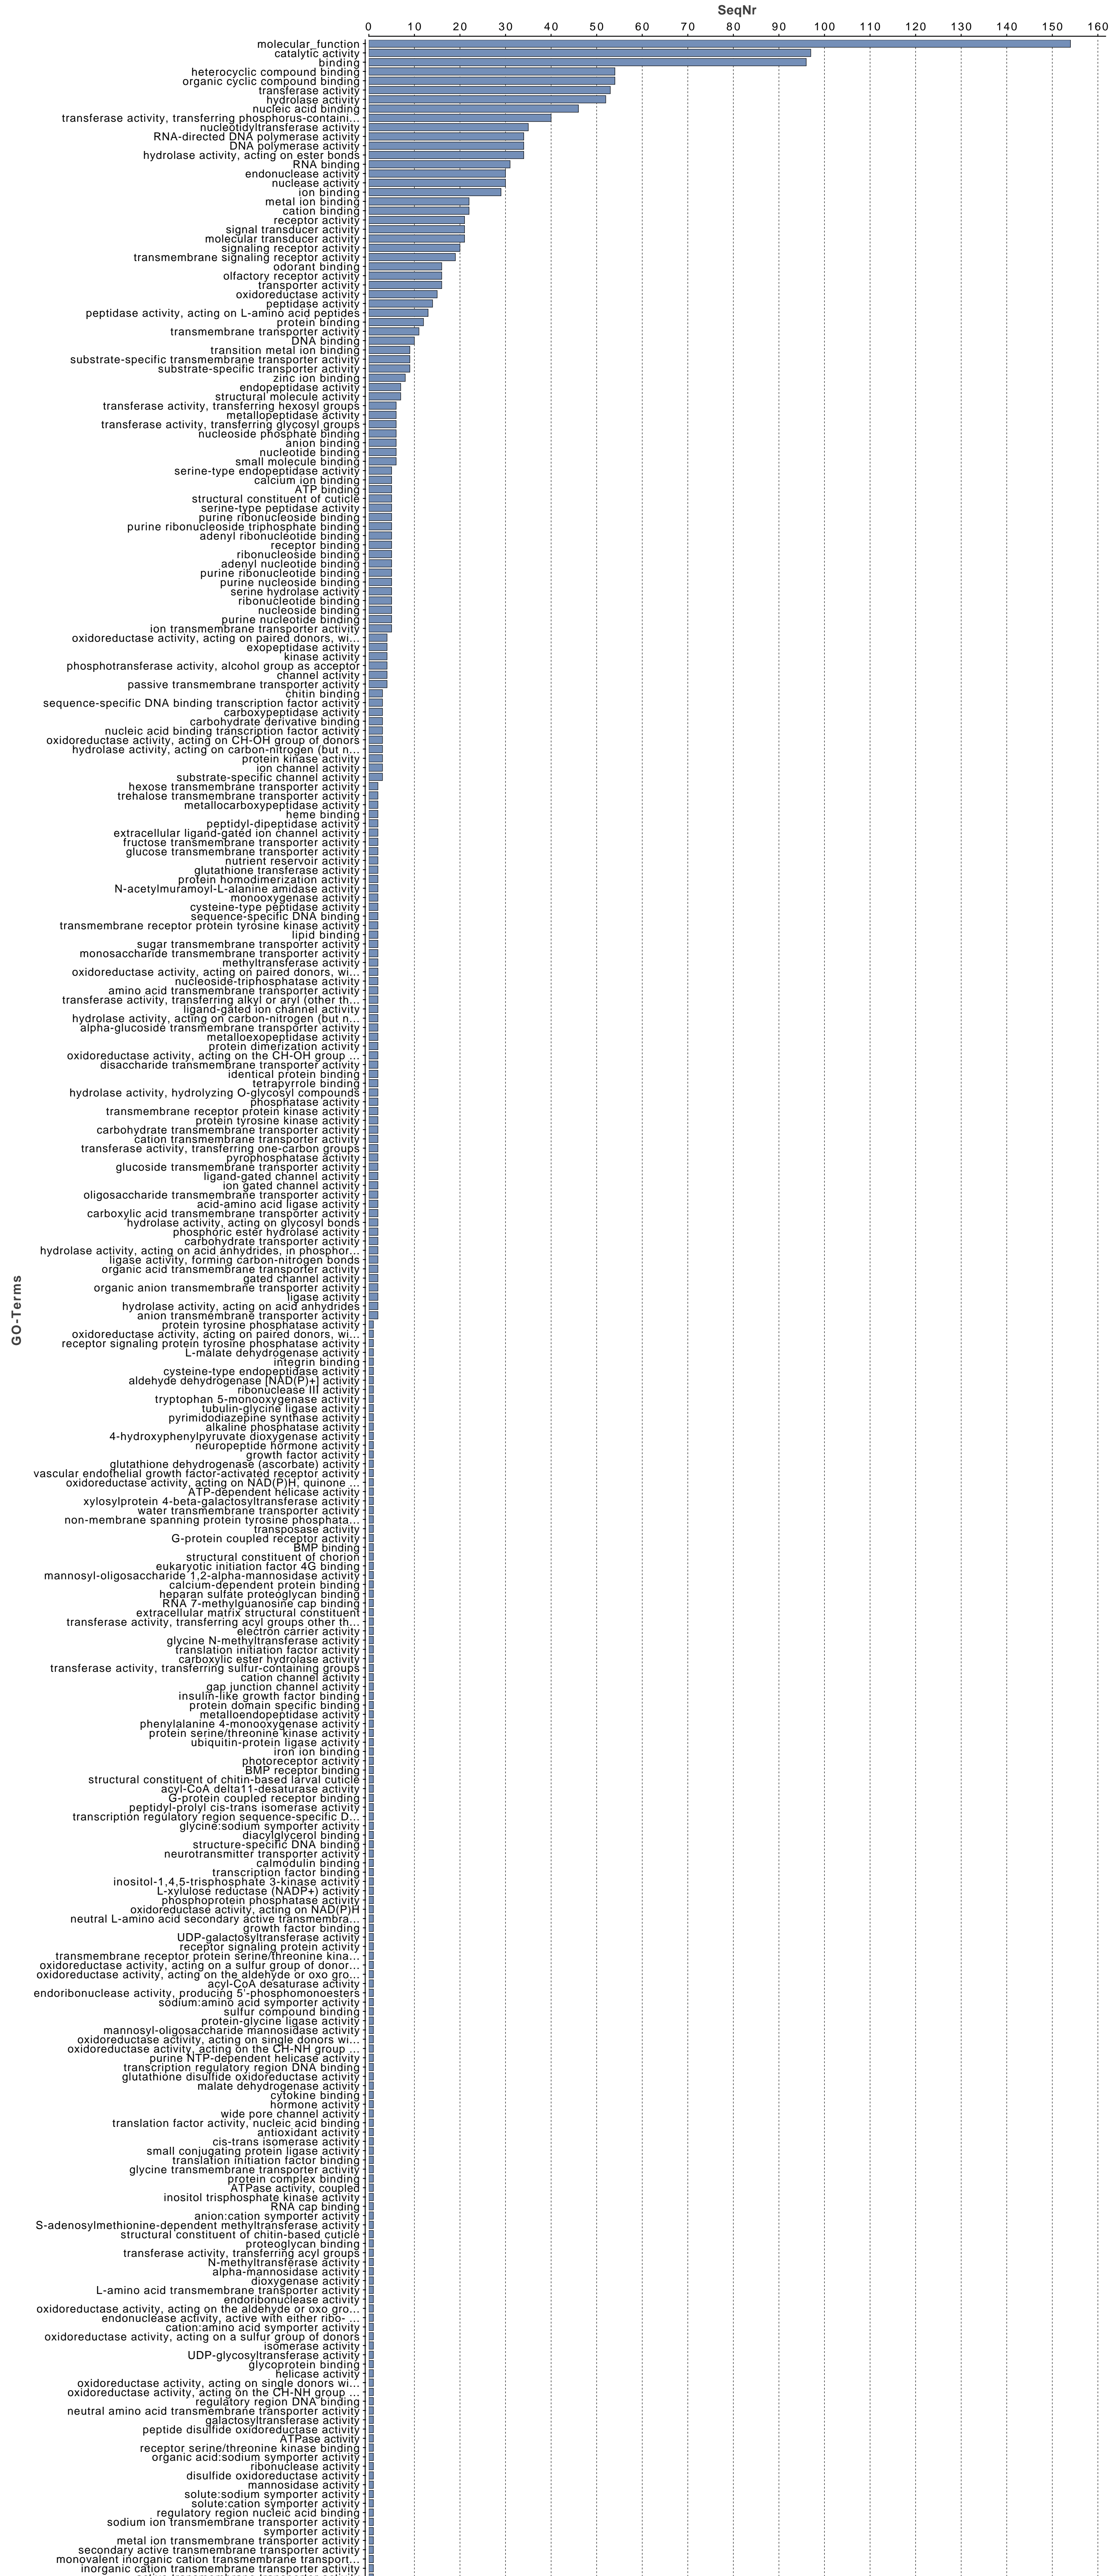

GO-Terms

# Sequence distribution: cellular\_component

SeqNr

0 5 10 15 20 25 30 35 40 45 50 55 60 65 70 75 80

GO-Terms

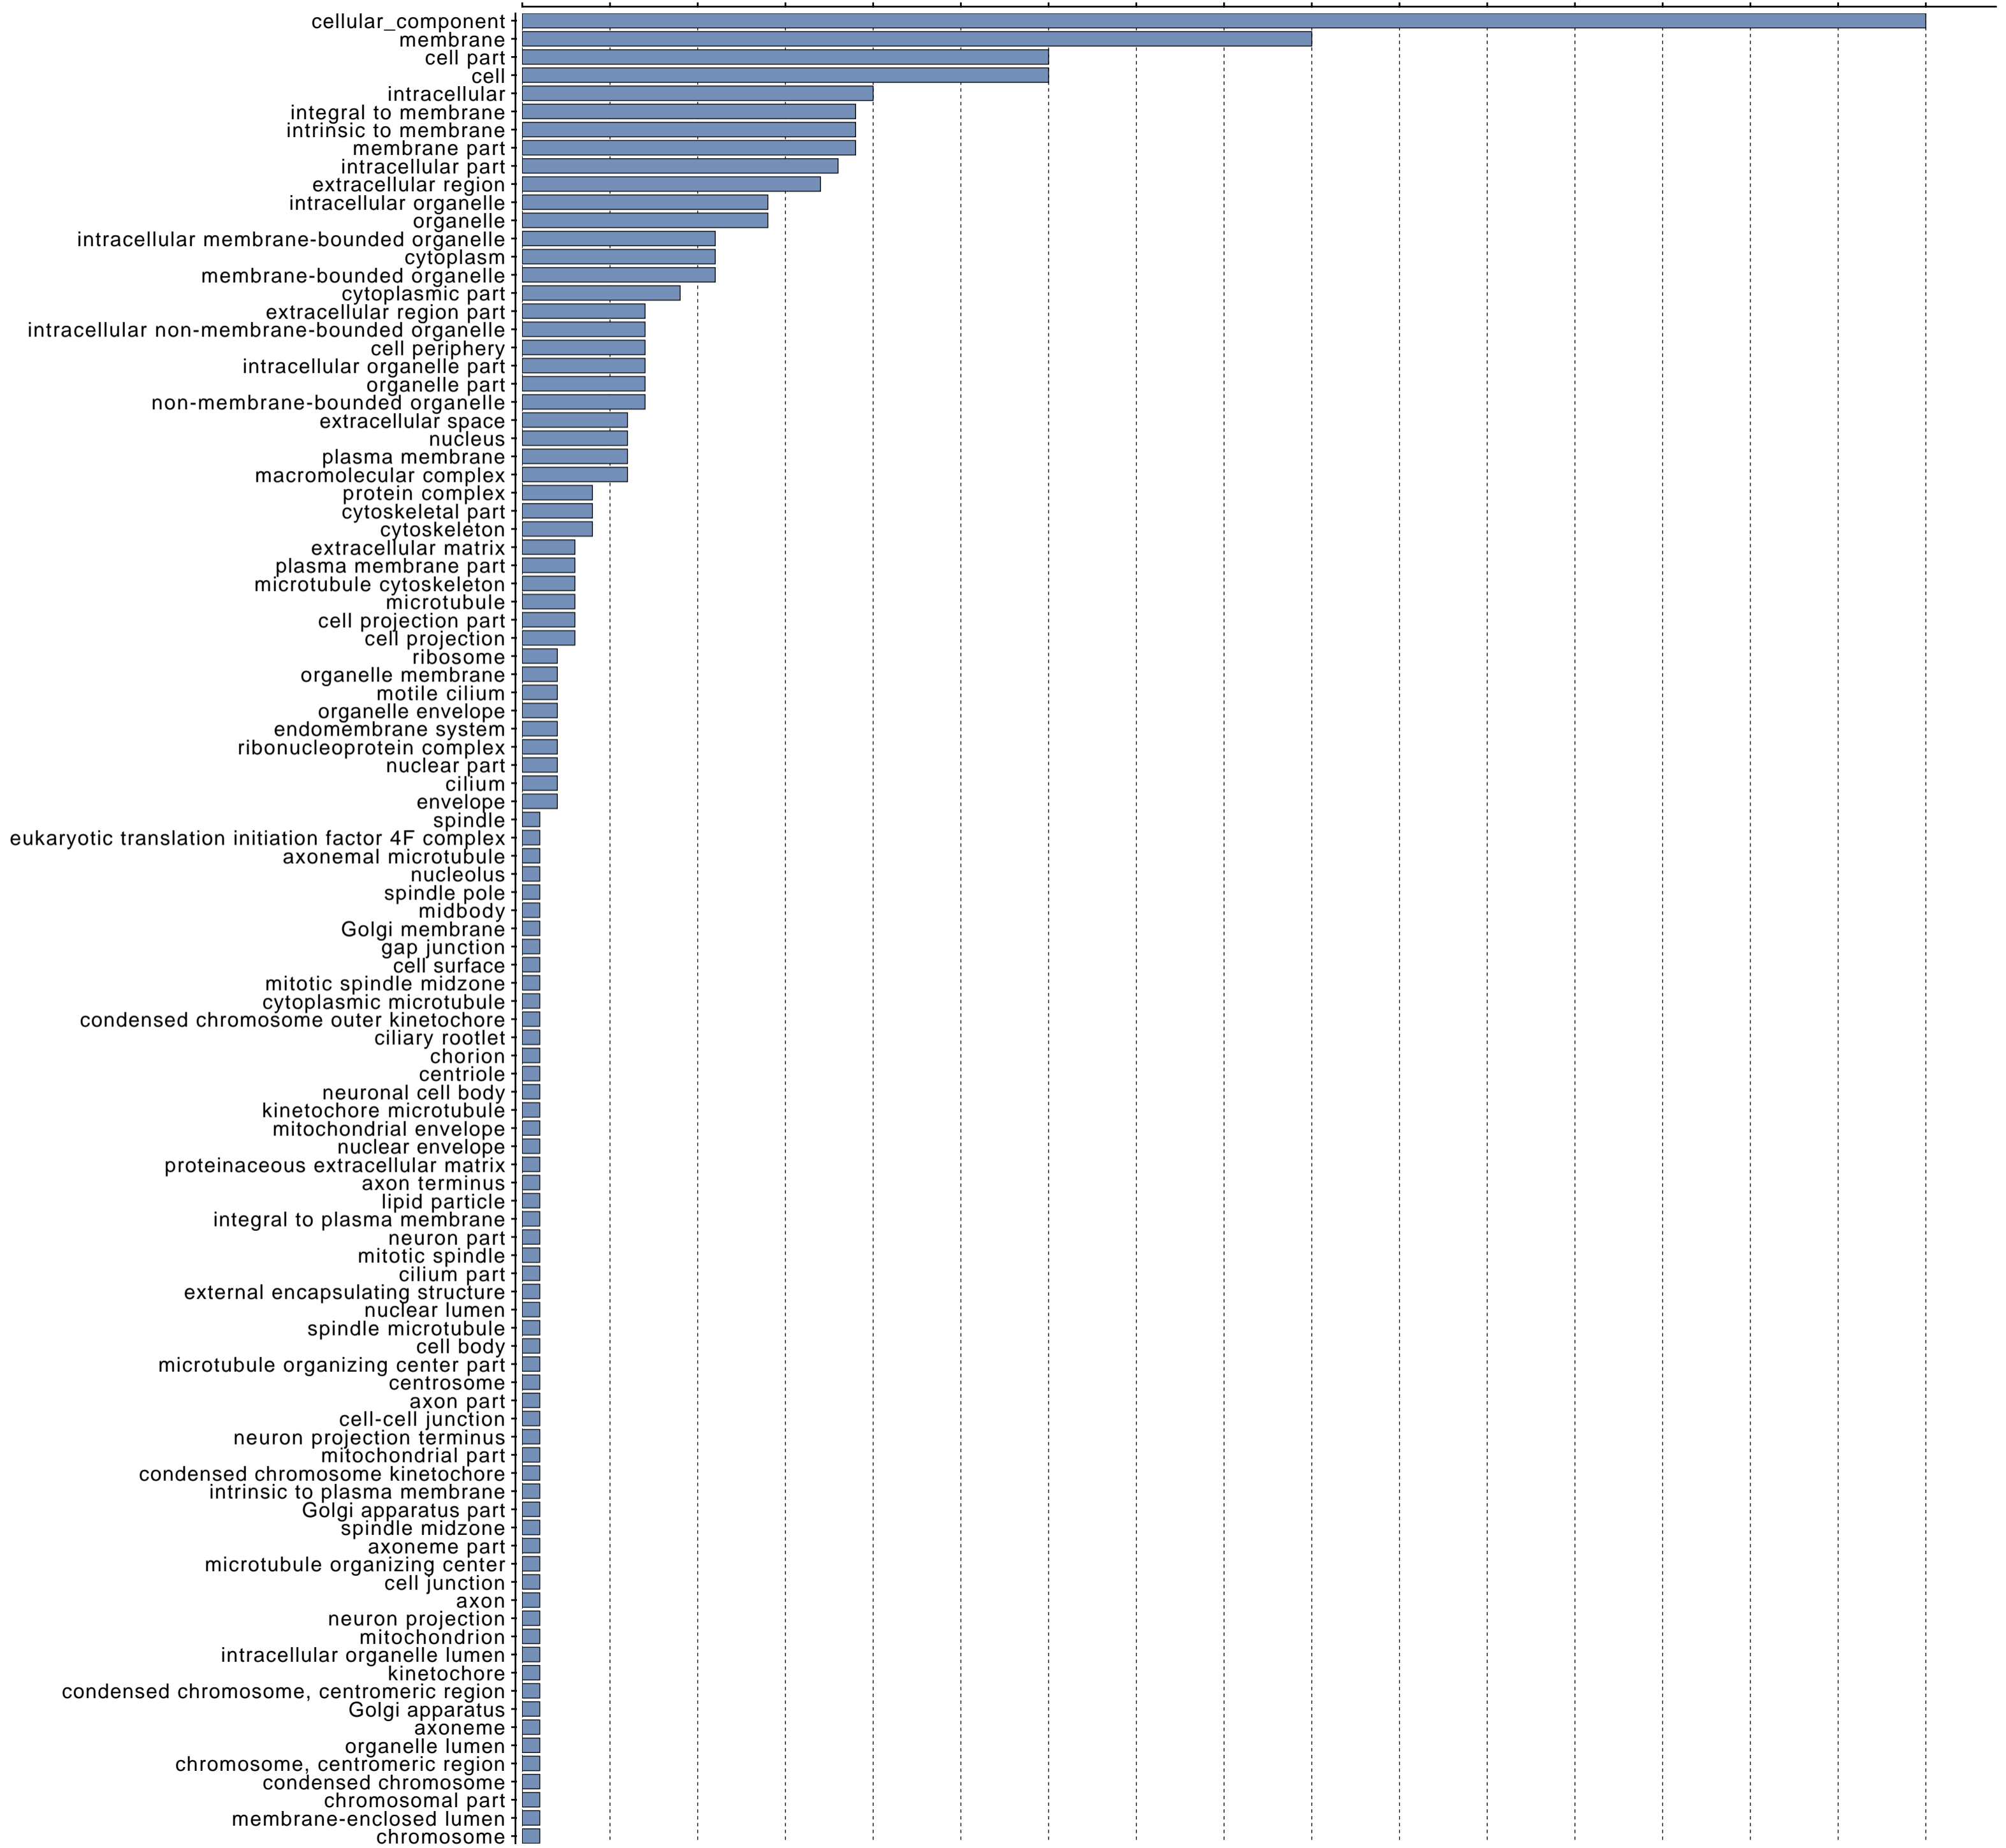

Supplement: pone.0121447.s006.pdf [file pone.0121447.s006.pdf]
